# Supplementary material
Source: PubMed Central journal article supplement (PMC9383266)
Supplement: ehp11092.s001.acco.pdf [file ehp11092.s001.acco.pdf]

**Note to readers with disabilities:** *EHP* strives to ensure that all journal content is accessible to all readers. However, some figures and Supplemental Material published in *EHP* articles may not conform to [508 standards](#) due to the complexity of the information being presented. If you need assistance accessing journal content, please contact [ehp508@niehs.nih.gov](mailto:ehp508@niehs.nih.gov). Our staff will work with you to assess and meet your accessibility needs within 3 working days.

### **Supplemental Material**

#### **Unconventional Oil and Gas Development Exposure and Risk of Childhood Acute Lymphoblastic Leukemia: A Case–Control Study in Pennsylvania, 2009–2017**

Cassandra J. Clark, Nicholas P. Johnson, Mario Soriano Jr, Joshua L. Warren, Keli M. Sorrentino, Nina S. Kadan-Lottick, James E. Saiers, Xiaomei Ma, and Nicole C. Deziel

#### **Table of Contents**

##### **Intermediate analyses of association and correlation to identify covariates and confounders for model building.**

**Table S1.** Intermediate  $\chi^2$  or t-test analyses to identify covariates and confounders for model building.

**Table S2.**  $\chi^2$  p-values representing relationships between potential covariates and confounders considered for model inclusion.

##### **Sensitivity analysis using the highly adjusted model.**

**Table S3.** Table of the risk of childhood acute lymphoblastic leukemia (odds ratios and 95% confidence intervals) by buffer size for the highly adjusted model assessed with the *aggregate and water-specific metric* for the primary and perinatal exposure windows.

**Intermediate analyses of association and correlation to identify covariates and confounders for model building.**

**Table S1. Intermediate  $\chi^2$  or t-test analyses to identify covariates and confounders for model building.**

| Covariate                                         | Association with exposure |                                         | Change in OR of >10%? |
|---------------------------------------------------|---------------------------|-----------------------------------------|-----------------------|
|                                                   | Association with outcome  | (ID <sup>2</sup> W 5km, primary window) |                       |
| Sex*                                              | 0.57                      | 0.41                                    | N                     |
| Gestational age                                   | 0.76                      | 0.30                                    | N                     |
| Birth weight                                      | 0.41                      | 0.37                                    | N                     |
| Mode of delivery*                                 | 0.40                      | 0.42                                    | N                     |
| Maternal race <sup>a</sup>                        | <0.01                     | <0.01                                   | Y                     |
| Maternal ethnicity <sup>a</sup>                   | 0.90                      | <0.01                                   | N                     |
| Maternal educational attainment <sup>b</sup>      | 0.96                      | <0.01                                   | N                     |
| Median household income <sup>b</sup>              | 0.82                      | <0.01                                   | N                     |
| Maternal marital status                           | 0.32                      | 0.70                                    | N                     |
| WIC use <sup>b</sup>                              | 0.18                      | 0.02                                    | Y                     |
| Percent cropland within 500m of home <sup>c</sup> | 0.24                      | <0.01                                   | N                     |
| Annual PM 2.5 [ug/m <sup>3</sup> ] <sup>c</sup>   | 0.93                      | <0.01                                   | N                     |

Data are complete for all variables. P-values generated using  $\chi^2$  tests. WIC: Supplemental Nutritional Program for Women, Infants, and Children. \*Included in highly adjusted model due to known biological importance. <sup>a</sup>Maternal race and ethnicity are highly correlated. <sup>b</sup>Maternal educational attainment, median household income, and use of WIC all represent socio-economic status and are highly correlated with one another. <sup>c</sup>T-test p-value.

**Table S2.  $\chi^2$  p-values representing relationships between potential covariates and confounders considered for model inclusion.**

| Covariate                       | Gestational age | Weight | Mode of delivery | Maternal race | Maternal ethnicity | Maternal educational attainment | Median household income | Maternal marital status | WIC use | Percent cropland within 500m of home (quartile) <sup>a</sup> | Annual PM 2.5 (quartile [ $\mu\text{g}/\text{m}^3$ ]) <sup>a</sup> |
|---------------------------------|-----------------|--------|------------------|---------------|--------------------|---------------------------------|-------------------------|-------------------------|---------|--------------------------------------------------------------|--------------------------------------------------------------------|
| Sex                             | 0.84            | <0.01  | 0.08             | 0.88          | 0.75               | 0.44                            | 0.66                    | 0.97                    | 0.48    | 0.25                                                         | 0.44                                                               |
| Gestational age                 | -               | <0.01  | <0.01            | 0.01          | 0.75               | 0.35                            | 0.35                    | <0.01                   | 0.27    | 0.03                                                         | 0.02                                                               |
| Weight                          |                 | -      | <0.01            | <0.01         | 0.02               | 0.39                            | 0.01                    | <0.01                   | 0.07    | <0.01                                                        | 0.53                                                               |
| Mode of delivery                |                 |        | -                | 0.13          | 0.58               | 0.02                            | 0.59                    | 0.05                    | 0.10    | 0.58                                                         | <0.01                                                              |
| Maternal race                   |                 |        |                  | -             | <0.01              | <0.01                           | <0.01                   | <0.01                   | <0.01*  | <0.01                                                        | <0.01                                                              |
| Maternal ethnicity              |                 |        |                  |               | -                  | <0.01                           | <0.01                   | <0.01                   | <0.01   | <0.01                                                        | 0.16                                                               |
| Maternal educational attainment |                 |        |                  |               |                    | -                               | <0.01                   | <0.01                   | <0.01   | <0.01                                                        | 0.32                                                               |

|                                                              |  |  |  |  |  |  |   |       |       |       |       |
|--------------------------------------------------------------|--|--|--|--|--|--|---|-------|-------|-------|-------|
| Median household income                                      |  |  |  |  |  |  | - | <0.01 | <0.01 | <0.01 | <0.01 |
| Maternal marital status                                      |  |  |  |  |  |  |   | -     | <0.01 | <0.01 | 0.25  |
| WIC use                                                      |  |  |  |  |  |  |   |       | -     | <0.01 | 0.09  |
| Percent cropland within 500m of home (quartile) <sup>a</sup> |  |  |  |  |  |  |   |       |       | -     | <0.01 |

Data are complete for all variables. P-values generated using  $\chi^2$  tests. WIC: Supplemental Nutritional Program for Women, Infants, and Children. \*Despite being statistically significantly associated, statistical checks revealed no collinearity or convergence issues when included together in the parsimonious model.

<sup>a</sup>Assessed as quartiles.

**Sensitivity analysis using the highly adjusted model.**

**Table S3. Table of the risk of childhood acute lymphoblastic leukemia (odds ratios and 95% confidence intervals) by buffer size for the highly adjusted model\* assessed with the *aggregate and water-specific metric* for the primary and perinatal exposure windows.**

| Exposure metric and buffer size | OR (95% CI)        |
|---------------------------------|--------------------|
| Primary window                  |                    |
| ID <sup>2</sup> W               |                    |
| 2 km                            | 1.70 (0.91, 3.23)  |
| 5 km                            | 1.18 (0.76, 1.76)  |
| 10 km                           | 1.03 (0.75, 1.40)  |
| ID <sub>ups</sub>               |                    |
| 2 km                            | 1.67 (0.64, 4.35)  |
| 5 km                            | 1.23 (0.64, 2.38)  |
| 10 km                           | 1.09 (0.64, 1.86)  |
| Perinatal window                |                    |
| ID <sup>2</sup> W               |                    |
| 2 km                            | 2.27 (0.89, 5.79)  |
| 5 km                            | 1.36 (0.79, 2.34)  |
| 10 km                           | 1.30 (0.90, 1.88)  |
| ID <sub>ups</sub>               |                    |
| 2 km                            | 2.37 (0.55, 10.10) |
| 5 km                            | 1.24 (0.49, 3.12)  |
| 10 km                           | 1.33 (0.69, 2.59)  |

Odds ratios and 95% confidence intervals calculated using unconditional logistic regression. \*Highly adjusted: adjusted for year of birth, maternal race, WIC, delivery route, sex, birth weight, percent cropland. OR: Odds Ratio; 95% CI: Confidence Interval.
