# Supplementary material
Source: PubMed Central journal article supplement (PMC9383266)
Supplement: ehp11092.smcontents.508.pdf [file ehp11092.smcontents.508.pdf]

**Note to readers with disabilities:** *EHP* strives to ensure that all journal content is accessible to all readers. However, some figures and Supplemental Material published in *EHP* articles may not conform to [508 standards](#) due to the complexity of the information being presented. If you need assistance accessing journal content, please contact [ehp508@niehs.nih.gov](mailto:ehp508@niehs.nih.gov). Our staff will work with you to assess and meet your accessibility needs within 3 working days.

### **Supplemental Material**

#### **Unconventional Oil and Gas Development Exposure and Risk of Childhood Acute Lymphoblastic Leukemia: A Case–Control Study in Pennsylvania, 2009–2017**

Cassandra J. Clark, Nicholas P. Johnson, Mario Soriano Jr, Joshua L. Warren, Keli M. Sorrentino, Nina S. Kadan-Lottick, James E. Saiers, Xiaomei Ma, and Nicole C. Deziel

#### **Table of Contents**

##### **Intermediate analyses of association and correlation to identify covariates and confounders for model building.**

**Table S1.** Intermediate  $\chi^2$  or t-test analyses to identify covariates and confounders for model building.

**Table S2.**  $\chi^2$  p-values representing relationships between potential covariates and confounders considered for model inclusion.

##### **Sensitivity analysis using the highly adjusted model.**

**Table S3.** Table of the risk of childhood acute lymphoblastic leukemia (odds ratios and 95% confidence intervals) by buffer size for the highly adjusted model assessed with the *aggregate and water-specific metric* for the primary and perinatal exposure windows.
